# Supplementary material for: Ras induces experimental lung metastasis through up-regulation of RbAp46 to suppress RECK promoter activity
Source: PubMed Central journal article supplement (PMC4377201; doi:10.1186/s12885-015-1155-7), 2015-03-25
Supplement: 12885_2015_1155_MOESM2_ESM.pdf [file 12885_2015_1155_MOESM2_ESM.pdf]

**A**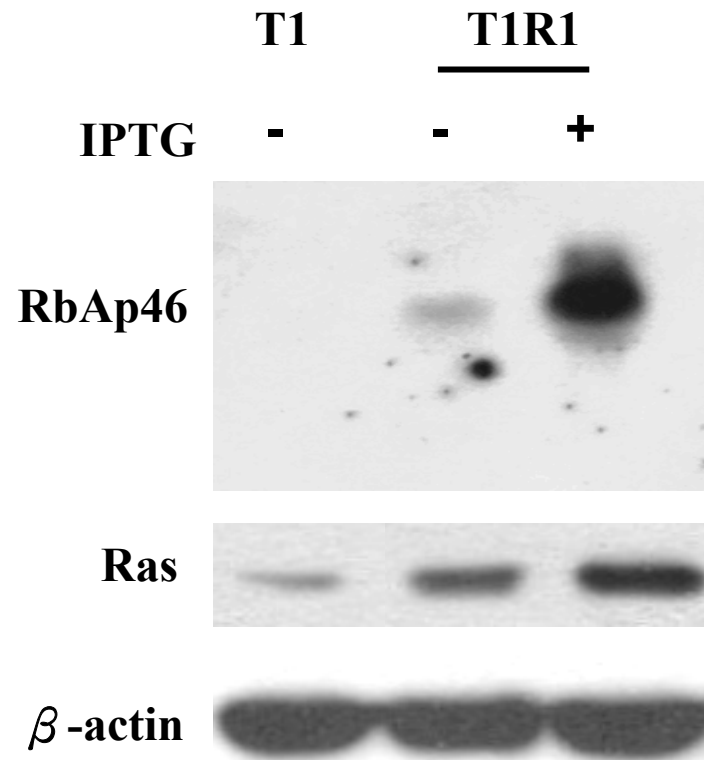**B**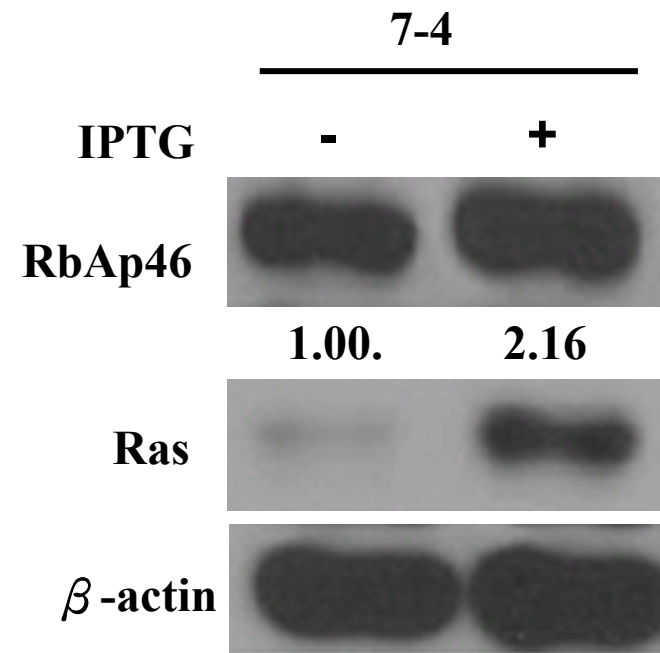**Supplementary Figure S1**

**A**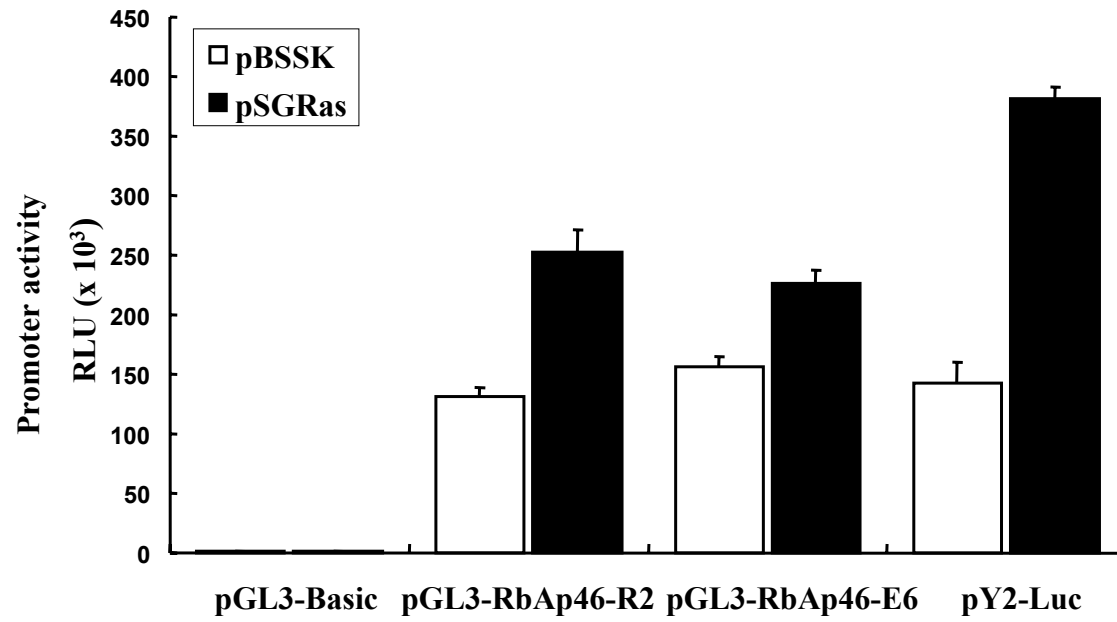**B**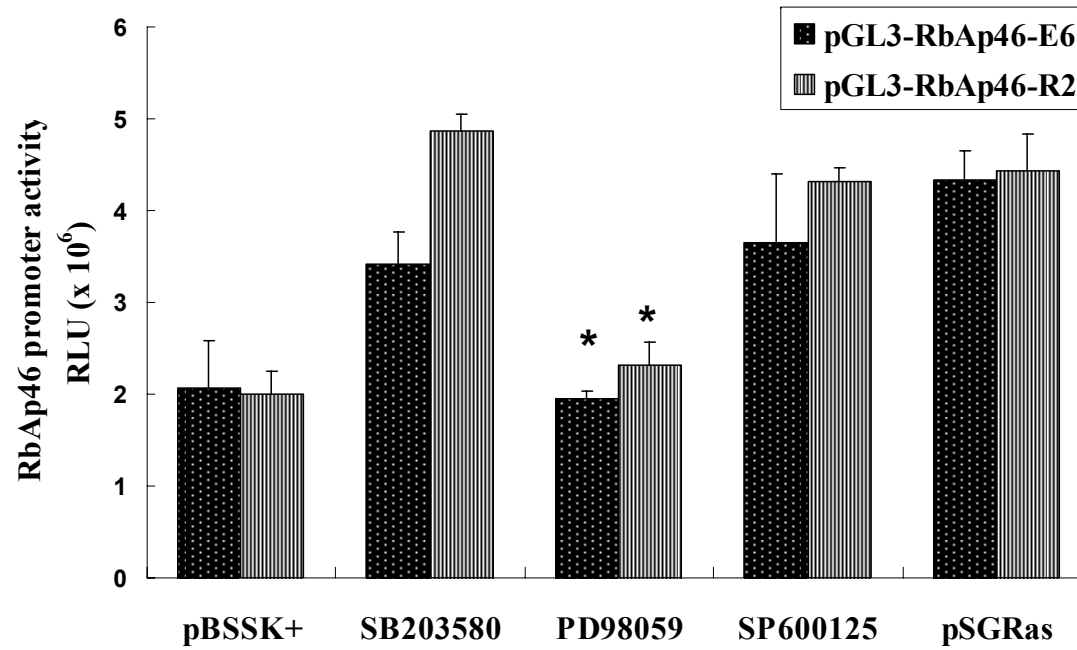

Table S1. Ras up-regulated genes screened by suppression subtractive hybridization PCR screening

| <b>Name</b>                                            | <b>Accession</b> | <b>UG_Link</b>   | <b>Gene_Symbol</b> | <b>Function</b>                                                  | <b>Ratio of mean</b> |
|--------------------------------------------------------|------------------|------------------|--------------------|------------------------------------------------------------------|----------------------|
| <b>RbAp46</b>                                          | <b>NM_002893</b> | <b>Hs.406078</b> | <b>N/A</b>         | <b>Negative regulation of transcription from Pol II promoter</b> | <b>2.7430104</b>     |
| <b>Lutheran blood group</b>                            | <b>P50895</b>    | <b>Hs.155048</b> | <b>Lu</b>          | <b>N/A</b>                                                       | <b>2.622386</b>      |
| <b>B-cell translocation gene 1, anti-proliferative</b> | <b>N70463</b>    | <b>Hs.77054</b>  | <b>BTG1</b>        | <b>Cell cycle</b>                                                | <b>2.5967418</b>     |
| <b>Protein kinase C, nu</b>                            | <b>AA463213</b>  | <b>Hs.143460</b> | <b>PRKCN</b>       | <b>Kinase</b>                                                    | <b>2.5919929</b>     |
